# Supplementary material for: A dissolving microneedle patch enables minimally invasive riboflavin delivery and enhances corneal crosslinking in keratoconus therapy
Source: Royal Society of Chemistry journal article supplement (doi:10.1039/d5tb00163c), 2025-01-01
Supplement: d5tb00163c1.pdf [file d5tb00163c1.pdf]

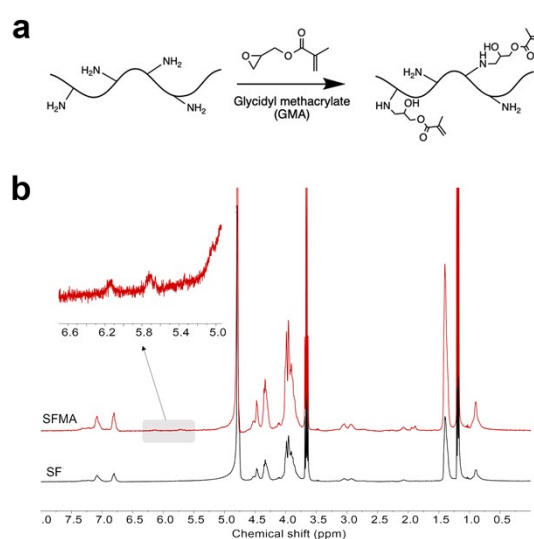

**Figure S1.** a) Schematic presentation of the synthesis process of SFMA. b)  $^1\text{H}$ NMR spectra of unsubstituted SF and SFMA.

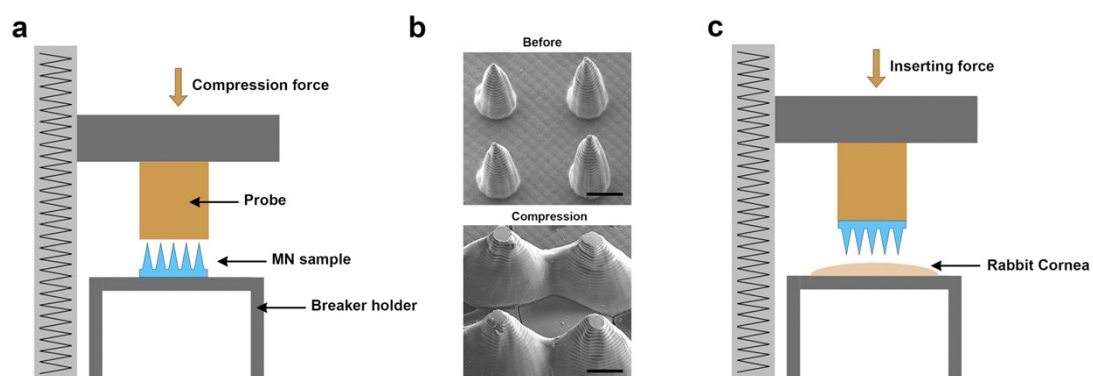

**Figure S2.** a) Illustration to depict testing of MN mechanical strength. b) SEM image of 20% SFMA MN before and after subjecting to compression Scale bar = 200  $\mu\text{m}$ . c) Illustration to depict testing of *ex vivo* MN corneal inserting test. Cornea was placed on breaker holder, block with MN attached to probe before insertion.

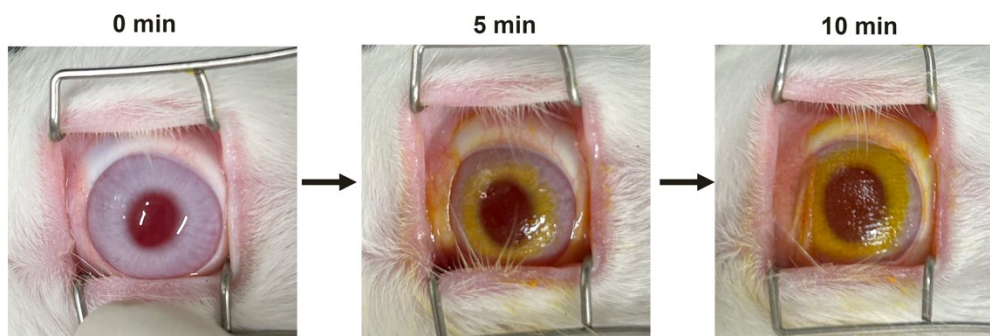

**Figure S3.** The photographs of the corneas after two 5-minute MN applications

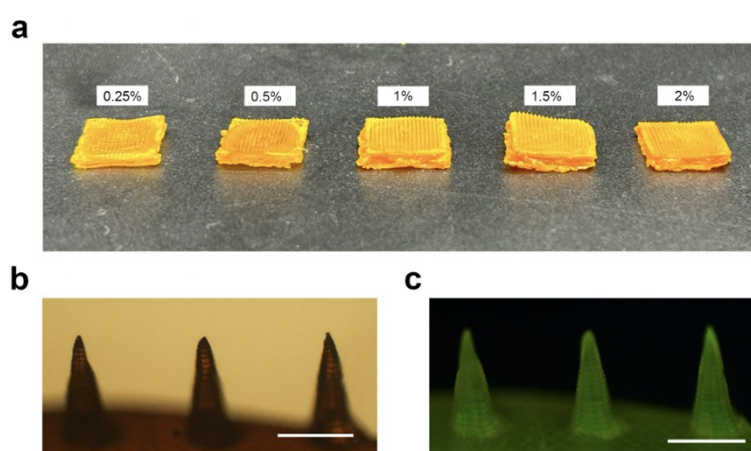

**Figure S4.** a) photographs of MN patches with different concentration of RF. b) The optical and c) fluorescence image of 1RF/SFMA-MN patches. Scale Bar = 200  $\mu$ m.

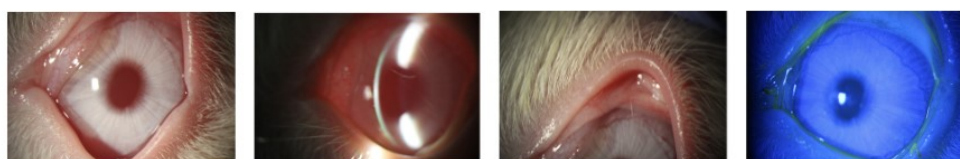

**Figure S5.** Representative slit-lamp images from control groups.

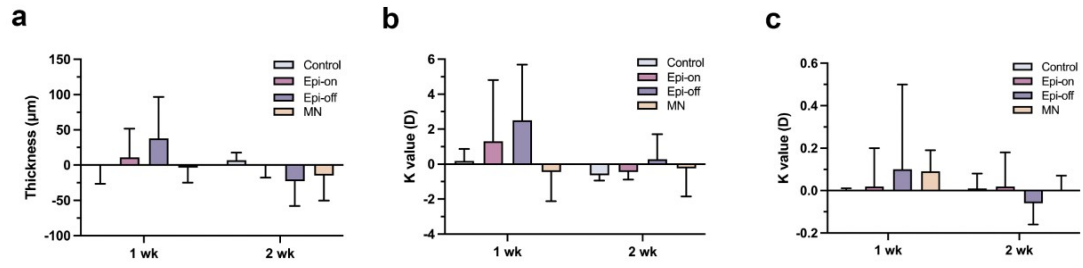

**Figure S6.** The change **a)** of corneal thickness, **b)** the anterior corneal surface curvature, and **c)** the posterior corneal surface curvature after different CXL surgeries.
